# Supplementary material for: Antibacterial and Antioxidant Activities of Prinsepia utilis Royle Leaf and Seed Extracts
Source: Hindawi journal article supplement (doi:10.1155/2022/3898939), 2022-10-17
Supplement: f1 [file 3898939.f1.pdf]

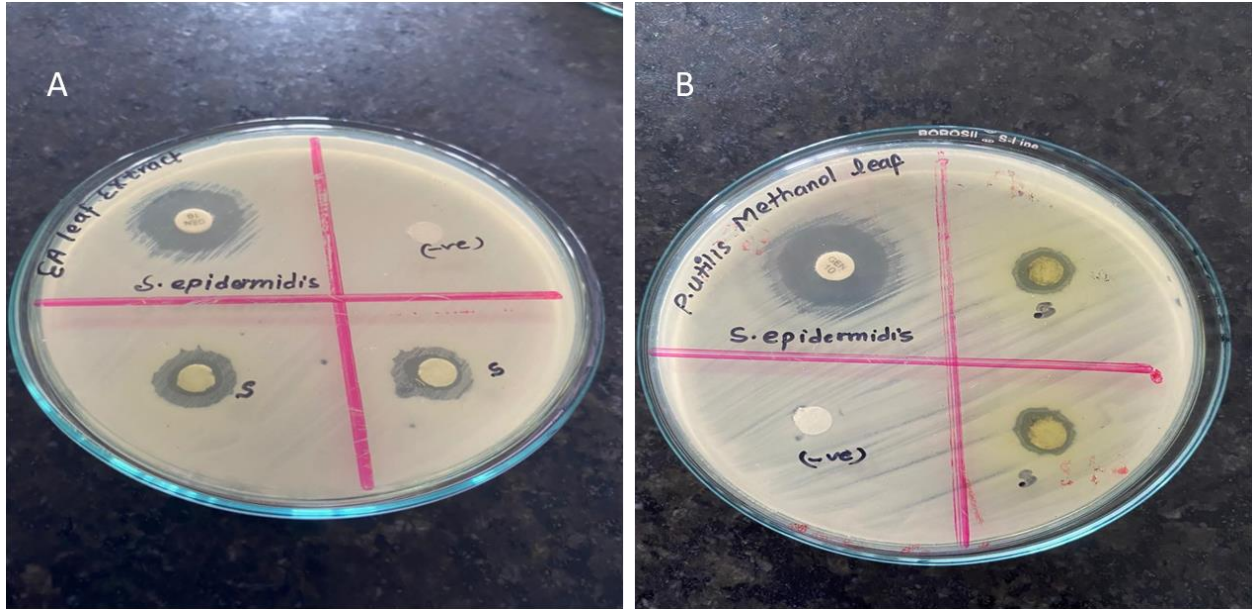

FIGURE S1: ZOI produced by *P. utilis* ethyl acetate leaf extract (A) and methanolic leaf extract (B), against *S. epidermidis*.

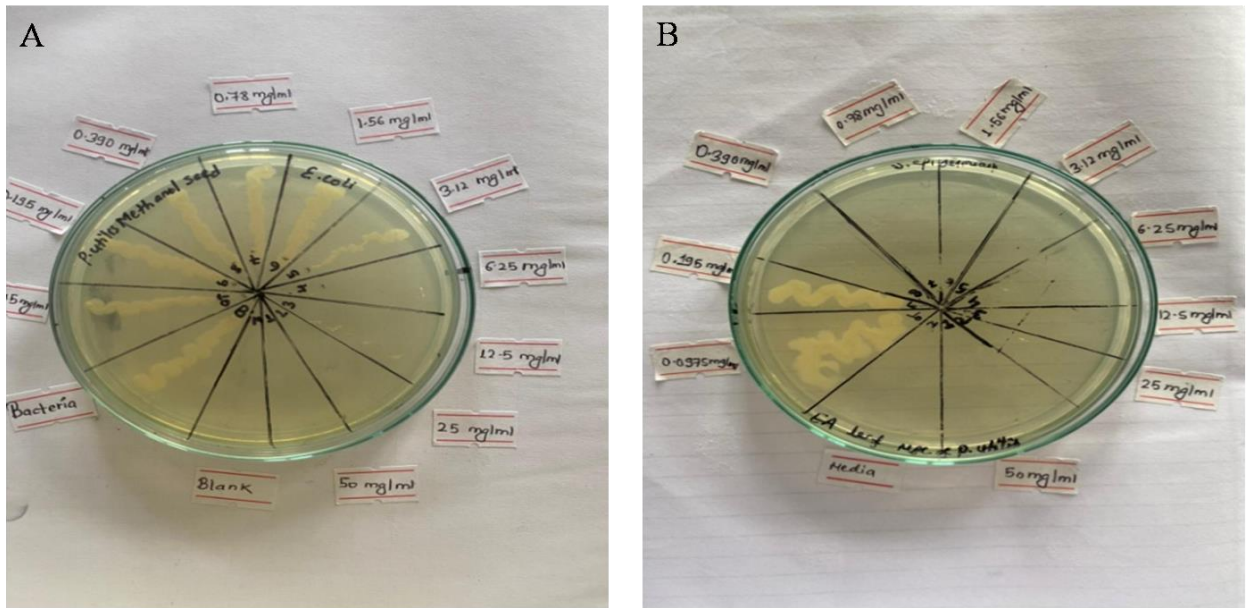

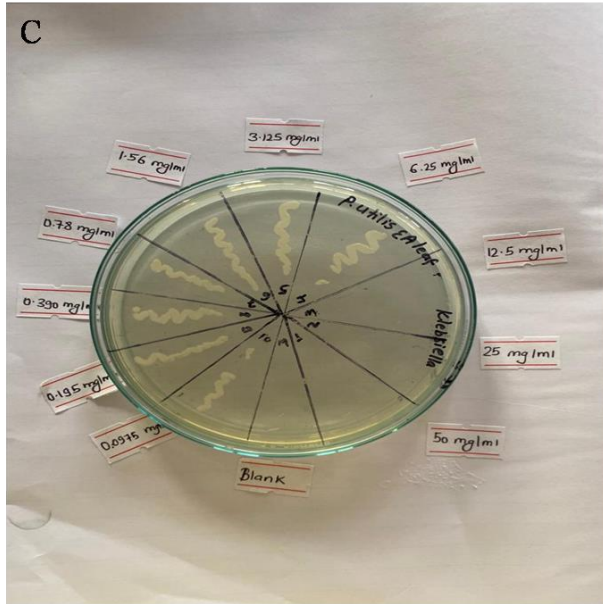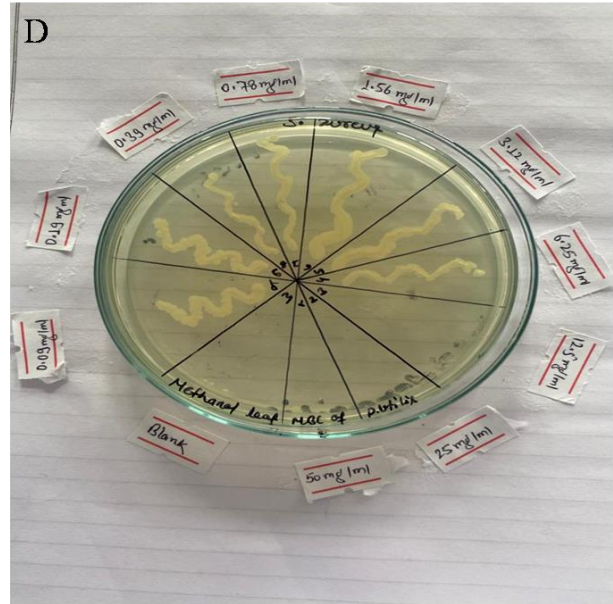

FIGURE S2: MBC determination of *P. utilis* extracts (A: methanolic seed extract against *E. coli*, B: ethyl acetate leaf extract against *S. epidermidis*; C: ethyl acetate leaf extract against *K. pneumoniae*; D: methanolic leaf extract against *S. aureus*).
